# Supplementary material for: Seasonal Variation in the Faecal Microbiota of Mature Adult Horses Maintained on Pasture in New Zealand
Source: MDPI journal article supplement (doi:10.3390/ani11082300), 2021-08-04

## **Text S1. Detailed materials and methods**

### **DNA extraction method**

The cells were disrupted by bead-beating for 4 min at 2100 oscillations s<sup>-1</sup> (Mini-Beadbeater-96, BioSpec, Bartlesville, OK, USA), with 0.7 g Zirconia beads (0.1 mm; dnature, Gisborne, New Zealand), 550 µl phenol-chloroform-isoamylalcohol (25:24:1 vol:vol:vol; pH 8), 282 µl buffer A (200 mM NaCl, 200 mM Tris, 20 mM EDTA, pH 8 with NaOH), 268 µl PM buffer (Qiagen, Hilden, Germany), and 200 µl sodium dodecyl sulphate (20% wt/vol) [1,2]. After centrifugation at 20,000 x g at 4°C for 20 min, 350 µl of the supernatant was removed, and treated at 37°C for 15 min with 5 µl RNase A (Life Technologies, Thermo Fisher Scientific, Auckland, New Zealand) [3]. The supernatant was then mixed with 650 µl PM buffer (Qiagen) and processed through the QIAquick column by applying a vacuum with a QIAvac 96 vacuum manifold (Qiagen). The membrane-bound DNA was washed with 750 µl PE buffer (Qiagen) twice as recommended by the manufacturer, and DNA was eluted in 80 µl elution buffer (10 mM Tris; pH 8.5 with HCl) and stored at -80°C.

### **PCR amplification and sequencing protocol**

#### *Primer and adapter sequences*

To amplify and sequence the V3-V4 hypervariable region of the 16S rRNA gene, specific bacterial primer sequences were selected, S-D-Bact-0341-b-S-17 and S-D-Bact-0785-a-A-21 [4]. The full length primer sequences, using standard IUPAC nucleotide nomenclature, were as follows:

16S Amplicon PCR Forward Primer:

5'TCGTCGGCAGCGTCAGATGTGTATAAGAGACAGCCTACGGGNGGCWGCAG

16S Amplicon PCR Reverse Primer:

5'GTCTCGTGGGCTCGGAGATGTGTATAAGAGACAGGACTACHVGGGTATCTAATCC

The Illumina overhang adapter sequences added to the locus-specific sequences were:

Forward overhang: 5' TCGTCGGCAGCGTCAGATGTGTATAAGAGACAG-[locus-specific sequence]

Reverse overhang: 5' GTCTCGTGGGCTCGGAGATGTGTATAAGAGACAG-[locus-specific sequence]

#### *Amplicon PCR*

The amplicons were prepared using 2.5 µl gDNA (5 ng/ µl), 5 µl forward primer (1 µM), 5 µl reverse primer (1 µM), 12.5 µl 2x KAPA HiFi HotStart Ready Mix, to make a master mix reaction of 25 µl. PCR was performed on a Thermocycler ProS (Eppendorf, Hamburg, Germany) using the following program: initial denaturation at 95°C for 3 minutes, 25 cycles of denaturation at 95°C for 30 seconds, annealing at 55°C for 30 seconds and elongation at 72°C for 30 seconds, followed by a final elongation

at 72°C for 5 minutes and held at 4°C. The amplicons were then purified using AMPure XP beads (AMPure, Agencourt, Beckman Coulter, Beverly, MA, USA).

#### *Index PCR*

The linker primer sequence used for the samples was GTGCCAGCMGCCGCGGTAA and the 8 bp unique barcodes are given in Table S1. The dual indices and Illumina sequencing adapters were attached to the PCR amplicons by the following protocol: 5 µl gDNA, 5 µl Nextera XT Index Primer 1 (N7xx), 5 µl Nextera XT Index Primer 2 (S5xx), 25 µl 2x KAPA HiFi HotStart Ready Mix, 10 µl PCR grade water, to make a total master mix of 50 µl. PCR was performed on a Thermocycler ProS (Eppendorf) using the following program: initial denaturation at 95°C for 3 minutes, 8 cycles of denaturation at 95°C for 30 seconds, annealing at 55°C for 30 seconds and elongation at 72°C for 30 seconds, followed by a final elongation at 72°C for 5 minutes and held at 4°C. The amplicons were then purified using AMPure XP beads (AMPure) [5].

#### *Library validation*

A sample of 1 µl of a 1:50 dilution of the final library was run on a Bioanalyzer DNA 1000 chip (2100 Bioanalyzer (Agilent Technologies, Santa Clara, CA, USA) to verify the size of the amplicons, which was expected to be ~630 bp when using the V3 and V4 primer pairs in the protocol.

#### **References**

1. Rius A, Kittelmann S, Macdonald K, Waghorn G, Janssen P, et al. (2012) Nitrogen metabolism and rumen microbial enumeration in lactating cows with divergent residual feed intake fed high-digestibility pasture. *Journal of dairy science* 95: 5024-5034.
2. Kittelmann S, Pinares-Patiño CS, Seedorf H, Kirk MR, Ganesh S, et al. (2014) Two Different Bacterial Community Types Are Linked with the Low-Methane Emission Trait in Sheep. *PLoS ONE* 9: e103171.
3. Healey A, Furtado A, Cooper T, Henry R (2014) Protocol: a simple method for extracting next-generation sequencing quality genomic DNA from recalcitrant plant species. *Plant Methods* 10: 21.
4. Klindworth A, Pruesse E, Schweer T, Peplies J, Quast C, et al. (2012) Evaluation of general 16S ribosomal RNA gene PCR primers for classical and next-generation sequencing-based diversity studies. *Nucleic acids research*: gks808.
5. Fadrosch DW, Ma B, Gajer P, Sengamalay N, Ott S, et al. (2014) An improved dual-indexing approach for multiplexed 16S rRNA gene sequencing on the Illumina MiSeq platform. *Microbiome* 2: 1-7.

**Table S1. Metadata on the faecal samples (n=118) included in the study on the seasonal variation in the faecal microbiota of pasture-fed horses (n=10)**

| SampleID | BarcodeSequenceID | HorseID | Breed        | AgeYears | Month    | Season | Diet    | Location  |
|----------|-------------------|---------|--------------|----------|----------|--------|---------|-----------|
| Jan_H1   | TAAGGCGA          | H1      | Standardbred | 26       | January  | Summer | Pasture | Paddock_3 |
| Jan_H2   | CGTACTAG          | H2      | Thoroughbred | 15       | January  | Summer | Pasture | Paddock_3 |
| Jan_H3   | AGGCAGAA          | H3      | Standardbred | 9        | January  | Summer | Pasture | Paddock_3 |
| Jan_H4   | TCCTGAGC          | H4      | Standardbred | 19       | January  | Summer | Pasture | Paddock_3 |
| Jan_H5   | GGACTCCT          | H5      | Thoroughbred | 12       | January  | Summer | Pasture | Paddock_3 |
| Jan_H6   | TAGGCATG          | H6      | Standardbred | 17       | January  | Summer | Pasture | Paddock_3 |
| Jan_H7   | CTCTCTAC          | H7      | Standardbred | 8        | January  | Summer | Pasture | Paddock_3 |
| Jan_H8   | CAGAGAGG          | H8      | Standardbred | 12       | January  | Summer | Pasture | Paddock_3 |
| Jan_H9   | GCTACGCT          | H9      | Standardbred | 19       | January  | Summer | Pasture | Paddock_3 |
| Jan_H10  | CGAGGCTG          | H10     | Standardbred | 14       | January  | Summer | Pasture | Paddock_3 |
| Feb_H1   | AAGAGGCA          | H1      | Standardbred | 26       | February | Summer | Pasture | Paddock_3 |
| Feb_H2   | GTAGAGGA          | H2      | Thoroughbred | 15       | February | Summer | Pasture | Paddock_3 |
| Feb_H3   | TAAGGCGA          | H3      | Standardbred | 9        | February | Summer | Pasture | Paddock_3 |
| Feb_H4   | CGTACTAG          | H4      | Standardbred | 19       | February | Summer | Pasture | Paddock_3 |
| Feb_H5   | AGGCAGAA          | H5      | Thoroughbred | 12       | February | Summer | Pasture | Paddock_3 |
| Feb_H6   | TCCTGAGC          | H6      | Standardbred | 17       | February | Summer | Pasture | Paddock_3 |
| Feb_H7   | GGACTCCT          | H7      | Standardbred | 8        | February | Summer | Pasture | Paddock_3 |
| Feb_H8   | TAGGCATG          | H8      | Standardbred | 12       | February | Summer | Pasture | Paddock_3 |
| Feb_H9   | CTCTCTAC          | H9      | Standardbred | 19       | February | Summer | Pasture | Paddock_3 |
| Feb_H10  | CAGAGAGG          | H10     | Standardbred | 14       | February | Summer | Pasture | Paddock_3 |
| Mar_H1   | GCTACGCT          | H1      | Standardbred | 26       | March    | Autumn | Pasture | Paddock_3 |
| Mar_H2   | CGAGGCTG          | H2      | Thoroughbred | 15       | March    | Autumn | Pasture | Paddock_3 |
| Mar_H3   | AAGAGGCA          | H3      | Standardbred | 9        | March    | Autumn | Pasture | Paddock_3 |
| Mar_H4   | GTAGAGGA          | H4      | Standardbred | 19       | March    | Autumn | Pasture | Paddock_3 |
| Mar_H5   | TAAGGCGA          | H5      | Thoroughbred | 12       | March    | Autumn | Pasture | Paddock_3 |
| Mar_H6   | CGTACTAG          | H6      | Standardbred | 17       | March    | Autumn | Pasture | Paddock_3 |
| Mar_H7   | AGGCAGAA          | H7      | Standardbred | 8        | March    | Autumn | Pasture | Paddock_3 |
| Mar_H8   | TCCTGAGC          | H8      | Standardbred | 12       | March    | Autumn | Pasture | Paddock_3 |
| Mar_H9   | GGACTCCT          | H9      | Standardbred | 19       | March    | Autumn | Pasture | Paddock_3 |

|         |          |     |              |    |       |        |             |           |
|---------|----------|-----|--------------|----|-------|--------|-------------|-----------|
| Mar_H10 | TAGGCATG | H10 | Standardbred | 14 | March | Autumn | Pasture     | Paddock_3 |
| Apr_H1  | CTCTCTAC | H1  | Standardbred | 26 | April | Autumn | Pasture     | Paddock_1 |
| Apr_H2  | CAGAGAGG | H2  | Thoroughbred | 15 | April | Autumn | Pasture     | Paddock_1 |
| Apr_H3  | GCTACGCT | H3  | Standardbred | 9  | April | Autumn | Pasture     | Paddock_1 |
| Apr_H4  | CGAGGCTG | H4  | Standardbred | 19 | April | Autumn | Pasture     | Paddock_1 |
| Apr_H5  | AAGAGGCA | H5  | Thoroughbred | 12 | April | Autumn | Pasture     | Paddock_1 |
| Apr_H6  | GTAGAGGA | H6  | Standardbred | 17 | April | Autumn | Pasture     | Paddock_1 |
| Apr_H7  | TAAGGCGA | H7  | Standardbred | 8  | April | Autumn | Pasture     | Paddock_1 |
| Apr_H8  | CGTACTAG | H8  | Standardbred | 12 | April | Autumn | Pasture     | Paddock_1 |
| Apr_H9  | AGGCAGAA | H9  | Standardbred | 19 | April | Autumn | Pasture     | Paddock_1 |
| Apr_H10 | TCCTGAGC | H10 | Standardbred | 14 | April | Autumn | Pasture     | Paddock_1 |
| May_H1  | GGACTCCT | H1  | Standardbred | 26 | May   | Autumn | Pasture     | Paddock_1 |
| May_H2  | TAGGCATG | H2  | Thoroughbred | 15 | May   | Autumn | Pasture     | Paddock_1 |
| May_H3  | CTCTCTAC | H3  | Standardbred | 9  | May   | Autumn | Pasture     | Paddock_1 |
| May_H4  | CAGAGAGG | H4  | Standardbred | 19 | May   | Autumn | Pasture     | Paddock_1 |
| May_H5  | GCTACGCT | H5  | Thoroughbred | 12 | May   | Autumn | Pasture     | Paddock_1 |
| May_H6  | CGAGGCTG | H6  | Standardbred | 17 | May   | Autumn | Pasture     | Paddock_1 |
| May_H7  | AAGAGGCA | H7  | Standardbred | 8  | May   | Autumn | Pasture     | Paddock_1 |
| May_H8  | GTAGAGGA | H8  | Standardbred | 12 | May   | Autumn | Pasture     | Paddock_1 |
| May_H10 | CGTACTAG | H10 | Standardbred | 14 | May   | Autumn | Pasture     | Paddock_1 |
| Jun_H1  | AGGCAGAA | H1  | Standardbred | 26 | June  | Winter | Pasture+Hay | Paddock_1 |
| Jun_H2  | TCCTGAGC | H2  | Thoroughbred | 15 | June  | Winter | Pasture+Hay | Paddock_1 |
| Jun_H3  | GGACTCCT | H3  | Standardbred | 9  | June  | Winter | Pasture+Hay | Paddock_1 |
| Jun_H4  | TAGGCATG | H4  | Standardbred | 19 | June  | Winter | Pasture+Hay | Paddock_1 |
| Jun_H5  | CTCTCTAC | H5  | Thoroughbred | 12 | June  | Winter | Pasture+Hay | Paddock_1 |
| Jun_H6  | CAGAGAGG | H6  | Standardbred | 17 | June  | Winter | Pasture+Hay | Paddock_1 |
| Jun_H7  | GCTACGCT | H7  | Standardbred | 8  | June  | Winter | Pasture+Hay | Paddock_1 |
| Jun_H8  | CGAGGCTG | H8  | Standardbred | 12 | June  | Winter | Pasture+Hay | Paddock_1 |
| Jun_H9  | AAGAGGCA | H9  | Standardbred | 19 | June  | Winter | Pasture+Hay | Paddock_1 |
| Jun_H10 | GTAGAGGA | H10 | Standardbred | 14 | June  | Winter | Pasture+Hay | Paddock_1 |
| Jul_H1  | TAAGGCGA | H1  | Standardbred | 26 | July  | Winter | Pasture+Hay | Paddock_1 |
| Jul_H2  | CGTACTAG | H2  | Thoroughbred | 15 | July  | Winter | Pasture+Hay | Paddock_1 |
| Jul_H3  | AGGCAGAA | H3  | Standardbred | 9  | July  | Winter | Pasture+Hay | Paddock_1 |
| Jul_H4  | TCCTGAGC | H4  | Standardbred | 19 | July  | Winter | Pasture+Hay | Paddock_1 |

|          |          |     |              |    |           |        |             |           |
|----------|----------|-----|--------------|----|-----------|--------|-------------|-----------|
| Jul_H5   | GGACTCCT | H5  | Thoroughbred | 12 | July      | Winter | Pasture+Hay | Paddock_1 |
| Jul_H6   | TAGGCATG | H6  | Standardbred | 17 | July      | Winter | Pasture+Hay | Paddock_1 |
| Jul_H7   | CTCTCTAC | H7  | Standardbred | 8  | July      | Winter | Pasture+Hay | Paddock_1 |
| Jul_H8   | CAGAGAGG | H8  | Standardbred | 12 | July      | Winter | Pasture+Hay | Paddock_1 |
| Jul_H9   | GCTACGCT | H9  | Standardbred | 19 | July      | Winter | Pasture+Hay | Paddock_1 |
| Jul_H10  | CGAGGCTG | H10 | Standardbred | 14 | July      | Winter | Pasture+Hay | Paddock_1 |
| Aug_H1   | AAGAGGCA | H1  | Standardbred | 26 | August    | Winter | Pasture+Hay | Paddock_1 |
| Aug_H2   | GTAGAGGA | H2  | Thoroughbred | 15 | August    | Winter | Pasture+Hay | Paddock_1 |
| Aug_H3   | TAAGGCGA | H3  | Standardbred | 9  | August    | Winter | Pasture+Hay | Paddock_1 |
| Aug_H4   | CGTACTAG | H4  | Standardbred | 19 | August    | Winter | Pasture+Hay | Paddock_1 |
| Aug_H5   | AGGCAGAA | H5  | Thoroughbred | 12 | August    | Winter | Pasture+Hay | Paddock_1 |
| Aug_H7   | GGACTCCT | H7  | Standardbred | 8  | August    | Winter | Pasture+Hay | Paddock_1 |
| Aug_H8   | TAGGCATG | H8  | Standardbred | 12 | August    | Winter | Pasture+Hay | Paddock_1 |
| Aug_H9   | CTCTCTAC | H9  | Standardbred | 19 | August    | Winter | Pasture+Hay | Paddock_1 |
| Aug_H10  | CAGAGAGG | H10 | Standardbred | 14 | August    | Winter | Pasture+Hay | Paddock_1 |
| Sept_H1  | GCTACGCT | H1  | Standardbred | 26 | September | Spring | Pasture+Hay | Paddock_1 |
| Sept_H2  | CGAGGCTG | H2  | Thoroughbred | 15 | September | Spring | Pasture+Hay | Paddock_1 |
| Sept_H3  | AAGAGGCA | H3  | Standardbred | 9  | September | Spring | Pasture+Hay | Paddock_1 |
| Sept_H4  | GTAGAGGA | H4  | Standardbred | 19 | September | Spring | Pasture+Hay | Paddock_1 |
| Sept_H5  | TAAGGCGA | H5  | Thoroughbred | 12 | September | Spring | Pasture+Hay | Paddock_1 |
| Sept_H6  | CGTACTAG | H6  | Standardbred | 17 | September | Spring | Pasture+Hay | Paddock_1 |
| Sept_H7  | AGGCAGAA | H7  | Standardbred | 8  | September | Spring | Pasture+Hay | Paddock_1 |
| Sept_H8  | TCCTGAGC | H8  | Standardbred | 12 | September | Spring | Pasture+Hay | Paddock_1 |
| Sept_H9  | GGACTCCT | H9  | Standardbred | 19 | September | Spring | Pasture+Hay | Paddock_1 |
| Sept_H10 | TAGGCATG | H10 | Standardbred | 14 | September | Spring | Pasture+Hay | Paddock_1 |
| Oct_H1   | CTCTCTAC | H1  | Standardbred | 26 | October   | Spring | Pasture+Hay | Paddock_1 |
| Oct_H2   | CAGAGAGG | H2  | Thoroughbred | 15 | October   | Spring | Pasture+Hay | Paddock_1 |
| Oct_H3   | GCTACGCT | H3  | Standardbred | 9  | October   | Spring | Pasture+Hay | Paddock_1 |
| Oct_H4   | CGAGGCTG | H4  | Standardbred | 19 | October   | Spring | Pasture+Hay | Paddock_1 |
| Oct_H5   | AAGAGGCA | H5  | Thoroughbred | 12 | October   | Spring | Pasture+Hay | Paddock_1 |
| Oct_H6   | GTAGAGGA | H6  | Standardbred | 17 | October   | Spring | Pasture+Hay | Paddock_1 |
| Oct_H7   | TAAGGCGA | H7  | Standardbred | 8  | October   | Spring | Pasture+Hay | Paddock_1 |
| Oct_H8   | CGTACTAG | H8  | Standardbred | 12 | October   | Spring | Pasture+Hay | Paddock_1 |
| Oct_H9   | AGGCAGAA | H9  | Standardbred | 19 | October   | Spring | Pasture+Hay | Paddock_1 |

|         |          |     |              |    |          |        |             |           |
|---------|----------|-----|--------------|----|----------|--------|-------------|-----------|
| Oct_H10 | TCCTGAGC | H10 | Standardbred | 14 | October  | Spring | Pasture+Hay | Paddock_1 |
| Nov_H1  | GGACTCCT | H1  | Standardbred | 26 | November | Spring | Pasture     | Paddock_1 |
| Nov_H2  | TAGGCATG | H2  | Thoroughbred | 15 | November | Spring | Pasture     | Paddock_1 |
| Nov_H3  | CTCTCTAC | H3  | Standardbred | 9  | November | Spring | Pasture     | Paddock_1 |
| Nov_H4  | CAGAGAGG | H4  | Standardbred | 19 | November | Spring | Pasture     | Paddock_1 |
| Nov_H5  | GCTACGCT | H5  | Thoroughbred | 12 | November | Spring | Pasture     | Paddock_1 |
| Nov_H6  | CGAGGCTG | H6  | Standardbred | 17 | November | Spring | Pasture     | Paddock_1 |
| Nov_H7  | AAGAGGCA | H7  | Standardbred | 8  | November | Spring | Pasture     | Paddock_1 |
| Nov_H8  | GTAGAGGA | H8  | Standardbred | 12 | November | Spring | Pasture     | Paddock_1 |
| Nov_H9  | TAAGGCGA | H9  | Standardbred | 19 | November | Spring | Pasture     | Paddock_1 |
| Nov_H10 | CGTACTAG | H10 | Standardbred | 14 | November | Spring | Pasture     | Paddock_1 |
| Dec_H1  | AGGCAGAA | H1  | Standardbred | 26 | December | Summer | Pasture     | Paddock_2 |
| Dec_H2  | TCCTGAGC | H2  | Thoroughbred | 15 | December | Summer | Pasture     | Paddock_2 |
| Dec_H3  | GGACTCCT | H3  | Standardbred | 9  | December | Summer | Pasture     | Paddock_2 |
| Dec_H4  | TAGGCATG | H4  | Standardbred | 19 | December | Summer | Pasture     | Paddock_2 |
| Dec_H5  | CTCTCTAC | H5  | Thoroughbred | 12 | December | Summer | Pasture     | Paddock_2 |
| Dec_H6  | CAGAGAGG | H6  | Standardbred | 17 | December | Summer | Pasture     | Paddock_2 |
| Dec_H7  | GCTACGCT | H7  | Standardbred | 8  | December | Summer | Pasture     | Paddock_2 |
| Dec_H8  | CGAGGCTG | H8  | Standardbred | 12 | December | Summer | Pasture     | Paddock_2 |
| Dec_H9  | AAGAGGCA | H9  | Standardbred | 19 | December | Summer | Pasture     | Paddock_2 |
| Dec_H10 | GTAGAGGA | H10 | Standardbred | 14 | December | Summer | Pasture     | Paddock_2 |

---

**Table S2. Comparison of mean relative abundance at phylum level between diet periods.**

| Taxon            | Pasture | Pasture + Hay | P value |
|------------------|---------|---------------|---------|
| Firmicutes       | 0.611   | 0.680         | <0.001* |
| Bacteroidetes    | 0.237   | 0.194         | 0.002*  |
| Verrucomicrobia  | 0.039   | 0.033         | 0.003*  |
| Unassigned phyla | 0.033   | 0.023         | <0.001* |
| Actinobacteria   | 0.018   | 0.015         | 0.024   |
| TM7              | 0.017   | 0.017         | 0.737   |
| Spirochaetes     | 0.016   | 0.010         | 0.002*  |
| Proteobacteria   | 0.006   | 0.005         | <0.001* |
| Tenericutes      | 0.006   | 0.005         | 0.178   |
| Cyanobacteria    | 0.004   | 0.003         | 0.003*  |
| Fibrobacteres    | 0.003   | 0.003         | 0.591   |
| Euryarchaeota    | 0.002   | 0.001         | 0.005   |
| WPS-2            | 0.001   | 0.002         | 0.119   |
| Fusobacteria     | <0.001  | <0.001        | 0.745   |
| Other Phyla <1%  | 0.007   | 0.007         | 0.336   |

\*Level of significance was  $P \leq 0.003$  after Bonferroni correction for multiple comparisons

**Table S3. Comparison of the mean relative abundance at genus level between diet periods.**

| <b>Taxon</b>                                                                        | <b>Pasture</b> | <b>Pasture+Hay</b> | <b>P value</b> |
|-------------------------------------------------------------------------------------|----------------|--------------------|----------------|
| Firmicutes>Clostridia>Clostridiales>Ruminococcaceae>unclassified genus              | 0.206          | 0.234              | <0.001*        |
| Firmicutes>Clostridia>Clostridiales>Lachnospiraceae>unclassified genus              | 0.135          | 0.136              | 0.581          |
| Firmicutes>Clostridia>Clostridiales>unclassified family>unclassified genus          | 0.116          | 0.140              | <0.001*        |
| Bacteroidetes>Bacteroidia>Bacteroidales>unclassified family>unclassified genus      | 0.108          | 0.086              | 0.002          |
| Unassigned genera                                                                   | 0.033          | 0.023              | <0.001*        |
| Verrucomicrobia>Verruco-5>WCHB1-41>RFP12>unclassified genus                         | 0.023          | 0.019              | <0.001*        |
| Bacteroidetes>Bacteroidia>Bacteroidales>Prevotellaceae>Prevotella                   | 0.023          | 0.020              | 0.132          |
| Firmicutes>Clostridia>Clostridiales>[Mogibacteriaceae]>unclassified genus           | 0.021          | 0.024              | 0.042          |
| Firmicutes>Clostridia>Clostridiales>Ruminococcaceae>Ruminococcus                    | 0.021          | 0.023              | 0.366          |
| Bacteroidetes>Bacteroidia>Bacteroidales>BS11>unclassified genus                     | 0.019          | 0.021              | 0.920          |
| Bacteroidetes>Bacteroidia>Bacteroidales>[Paraprevotellaceae]>unclassified genus     | 0.018          | 0.020              | 0.876          |
| TM7>TM7-3>CW040>F16>unclassified genus                                              | 0.017          | 0.017              | 0.702          |
| Bacteroidetes>Bacteroidia>Bacteroidales>[Paraprevotellaceae]>YRC22                  | 0.015          | 0.015              | 0.668          |
| Verrucomicrobia>Verrucomicrobiae>Verrucomicrobiales>Verrucomicrobiaceae>Akkermansia | 0.014          | 0.014              | 0.058          |
| Bacteroidetes>Bacteroidia>Bacteroidales>[Paraprevotellaceae]>CF231                  | 0.013          | 0.007              | <0.001*        |
| Spirochaetes>Spirochaetes>Spirochaetales>Spirochaetaceae>Treponema                  | 0.012          | 0.009              | 0.011          |
| Firmicutes>Clostridia>Clostridiales>Lachnospiraceae>Coproccoccus                    | 0.011          | 0.013              | 0.046          |
| Firmicutes>Erysipelotrichi>Erysipelotrichales>Erysipelotrichaceae>p-75-a5           | 0.011          | 0.012              | 0.310          |
| Firmicutes>Clostridia>Clostridiales>Veillonellaceae>Phascolarctobacterium           | 0.009          | 0.006              | 0.005          |
| Bacteroidetes>Bacteroidia>Bacteroidales>RF16>unclassified genus                     | 0.008          | 0.003              | <0.001*        |
| Bacteroidetes>Bacteroidia>Bacteroidales>Bacteroidaceae>BF311                        | 0.008          | 0.007              | 0.036          |
| Firmicutes>Clostridia>Clostridiales>Ruminococcaceae>Oscillospira                    | 0.008          | 0.009              | 0.307          |
| Bacteroidetes>Bacteroidia>Bacteroidales>Porphyromonadaceae>Paludibacter             | 0.008          | 0.002              | 0.036          |
| Firmicutes>Clostridia>Clostridiales>Clostridiaceae>Clostridium                      | 0.007          | 0.008              | 0.544          |
| Firmicutes>Clostridia>Clostridiales>Clostridiaceae>unclassified genus               | 0.007          | 0.013              | <0.001*        |
| Actinobacteria>Coriobacteriia>Coriobacteriales>Coriobacteriaceae>unclassified genus | 0.007          | 0.008              | 0.063          |
| Firmicutes>Clostridia>Clostridiales>Lachnospiraceae>Other                           | 0.006          | 0.005              | 0.036          |
| Firmicutes>Clostridia>Clostridiales>Christensenellaceae>unclassified genus          | 0.006          | 0.008              | <0.001*        |



|                                                                                            |        |        |         |
|--------------------------------------------------------------------------------------------|--------|--------|---------|
| Bacteroidetes>Bacteroidia>Bacteroidales>[Paraprevotellaceae]>[Prevotella]                  | 0.005  | 0.004  | 0.019   |
| Firmicutes>Clostridia>Clostridiales>Lachnospiraceae>Blautia                                | 0.005  | 0.004  | 0.288   |
| Firmicutes>Clostridia>Clostridiales>Lachnospiraceae>Pseudobutyrvibrio                      | 0.004  | 0.004  | 0.221   |
| Firmicutes>Clostridia>Clostridiales>Eubacteriaceae>Pseudoramibacter_Eubacterium            | 0.004  | 0.005  | 0.881   |
| Firmicutes>Bacilli>Lactobacillales>Lactobacillaceae>Lactobacillus                          | 0.004  | 0.008  | <0.001* |
| Tenericutes>Mollicutes>RF39>unclassified family>unclassified genus                         | 0.004  | 0.005  | 0.387   |
| Bacteroidetes>Bacteroidia>Bacteroidales>Bacteroidaceae>Bacteroides                         | 0.004  | 0.004  | 0.003   |
| Firmicutes>Clostridia>Clostridiales>unclassified family>unclassified genus                 | 0.004  | 0.003  | 0.044   |
| Cyanobacteria>4C0d-2>YS2>unclassified family>unclassified genus                            | 0.004  | 0.003  | 0.004   |
| Fibrobacteres>Fibrobacteria>Fibrobacterales>Fibrobacteraceae>Fibrobacter                   | 0.003  | 0.003  | 0.591   |
| Spirochaetes>MVP-15>PL-11B10>unclassified family>unclassified genus                        | 0.003  | 0.001  | 0.864   |
| Actinobacteria>Actinobacteria>Actinomycetales>Nocardiaceae>Rhodococcus                     | 0.002  | 0.001  | <0.001* |
| Firmicutes>Erysipelotrichi>Erysipelotrichales>Erysipelotrichaceae>RFN20                    | 0.002  | 0.001  | 0.031   |
| Bacteroidetes>Bacteroidia>Bacteroidales>Bacteroidaceae>unclassified genus                  | 0.002  | 0.002  | 0.128   |
| Firmicutes>Clostridia>Clostridiales>Veillonellaceae>unclassified genus                     | 0.002  | 0.004  | 0.022   |
| WPS-2>unclassified class>unclassified order>unclassified family>unclassified genus         | 0.001  | 0.002  | 0.119   |
| Firmicutes>Clostridia>Clostridiales>Clostridiaceae>Sarcina                                 | 0.001  | 0.003  | <0.001* |
| Firmicutes>Clostridia>Clostridiales>Lachnospiraceae>[Ruminococcus]                         | 0.001  | 0.003  | 0.484   |
| Euryarchaeota>Methanobacteria>Methanobacteriales>Methanobacteriaceae>Methanobrevibacter    | 0.001  | 0.001  | 0.741   |
| Verrucomicrobia>Verruco-5>LD1-PB3>unclassified family>unclassified genus                   | <0.001 | <0.001 | 0.549   |
| Firmicutes>Clostridia>Clostridiales>Lachnospiraceae>Epulopiscium                           | <0.001 | 0.001  | 0.015   |
| Proteobacteria>Gammaproteobacteria>Enterobacteriales>Enterobacteriaceae>unclassified genus | <0.001 | <0.001 | 0.049   |
| Fusobacteria>Fusobacteriia>Fusobacteriales>Fusobacteriaceae>Fusobacterium                  | <0.001 | <0.001 | 0.545   |
| Other Genera <1%                                                                           | 0.049  | 0.039  | <0.001* |

\*Level of significance was  $P \leq 0.001$  after Bonferroni correction for multiple comparisons

**Table S4. Comparison of mean relative abundance at phylum level between horses.**

| Taxon            | H1     | H2     | H3     | H4    | H5     | H6     | H7     | H8     | H9     | H10    | P value |
|------------------|--------|--------|--------|-------|--------|--------|--------|--------|--------|--------|---------|
| Firmicutes       | 0.608  | 0.655  | 0.605  | 0.635 | 0.634  | 0.656  | 0.648  | 0.655  | 0.620  | 0.680  | 0.281   |
| Bacteroidetes    | 0.239  | 0.224  | 0.24   | 0.225 | 0.231  | 0.195  | 0.221  | 0.203  | 0.232  | 0.178  | 0.436   |
| Unassigned phyla | 0.033  | 0.028  | 0.032  | 0.027 | 0.033  | 0.026  | 0.025  | 0.026  | 0.029  | 0.030  | 0.199   |
| Verrucomicrobia  | 0.032  | 0.027  | 0.036  | 0.040 | 0.029  | 0.04   | 0.027  | 0.04   | 0.045  | 0.053  | 0.001*  |
| TM7              | 0.025  | 0.009  | 0.024  | 0.019 | 0.017  | 0.018  | 0.015  | 0.022  | 0.01   | 0.012  | 0.007   |
| Spirochaetes     | 0.017  | 0.018  | 0.015  | 0.011 | 0.014  | 0.010  | 0.015  | 0.011  | 0.017  | 0.009  | 0.049   |
| Actinobacteria   | 0.016  | 0.014  | 0.017  | 0.015 | 0.015  | 0.023  | 0.020  | 0.016  | 0.018  | 0.017  | 0.359   |
| Tenericutes      | 0.006  | 0.005  | 0.008  | 0.006 | 0.005  | 0.006  | 0.006  | 0.006  | 0.005  | 0.004  | 0.002*  |
| Proteobacteria   | 0.005  | 0.005  | 0.005  | 0.005 | 0.005  | 0.009  | 0.006  | 0.006  | 0.006  | 0.004  | 0.180   |
| Cyanobacteria    | 0.005  | 0.004  | 0.004  | 0.003 | 0.004  | 0.003  | 0.003  | 0.004  | 0.003  | 0.002  | 0.009   |
| Fibrobacteres    | 0.004  | 0.003  | 0.004  | 0.003 | 0.005  | 0.003  | 0.003  | 0.001  | 0.004  | 0.002  | 0.098   |
| Euryarchaeota    | 0.002  | 0.001  | 0.002  | 0.001 | 0.001  | 0.002  | 0.002  | 0.001  | 0.001  | 0.001  | 0.088   |
| WPS-2            | 0.002  | 0.001  | 0.002  | 0.001 | 0.001  | 0.004  | 0.002  | 0.002  | 0.002  | 0.001  | 0.049   |
| Fusobacteria     | <0.001 | <0.001 | <0.001 | 0.001 | <0.001 | <0.001 | <0.001 | <0.001 | <0.001 | <0.001 | 0.826   |
| Other Phyla <1%  | 0.007  | 0.005  | 0.007  | 0.008 | 0.007  | 0.006  | 0.006  | 0.007  | 0.01   | 0.008  | 0.001*  |

\*Level of significance was  $P \leq 0.003$  after Bonferroni correction for multiple comparisons

**Table S5. Comparison of the mean relative abundance at genus level between horses.**

| <b>Taxon</b>                                                                         | <b>H1</b> | <b>H2</b> | <b>H3</b> | <b>H4</b> | <b>H5</b> | <b>H6</b> | <b>H7</b> | <b>H8</b> | <b>H9</b> | <b>H10</b> | <b>P value</b> |
|--------------------------------------------------------------------------------------|-----------|-----------|-----------|-----------|-----------|-----------|-----------|-----------|-----------|------------|----------------|
| Firmicutes>Clostridia>Clostridiales>Ruminococcaceae>unclassified genus               | 0.203     | 0.221     | 0.218     | 0.210     | 0.223     | 0.221     | 0.220     | 0.243     | 0.207     | 0.208      | 0.450          |
| Firmicutes>Clostridia>Clostridiales>Lachnospiraceae>unclassified genus               | 0.140     | 0.163     | 0.104     | 0.141     | 0.122     | 0.145     | 0.127     | 0.120     | 0.140     | 0.153      | 0.002          |
| Firmicutes>Clostridia>Clostridiales>unclassified family>unclassified genus           | 0.119     | 0.116     | 0.128     | 0.125     | 0.129     | 0.129     | 0.127     | 0.129     | 0.117     | 0.14       | 0.737          |
| Bacteroidetes>Bacteroidia>Bacteroidales>unclassified family>unclassified genus       | 0.114     | 0.094     | 0.110     | 0.098     | 0.105     | 0.091     | 0.109     | 0.084     | 0.110     | 0.077      | 0.259          |
| Unassigned genera                                                                    | 0.033     | 0.028     | 0.032     | 0.027     | 0.033     | 0.026     | 0.025     | 0.026     | 0.029     | 0.030      | 0.199          |
| TM7>TM7-3>CW040>F16>unclassified genus                                               | 0.025     | 0.009     | 0.024     | 0.018     | 0.016     | 0.018     | 0.015     | 0.022     | 0.010     | 0.012      | 0.007          |
| Firmicutes>Clostridia>Clostridiales>[Mogibacteriaceae]>unclassified genus            | 0.023     | 0.016     | 0.023     | 0.021     | 0.023     | 0.020     | 0.020     | 0.024     | 0.025     | 0.027      | 0.126          |
| Bacteroidetes>Bacteroidia>Bacteroidales>BS11>unclassified genus                      | 0.022     | 0.017     | 0.026     | 0.021     | 0.020     | 0.018     | 0.013     | 0.027     | 0.017     | 0.018      | 0.097          |
| Bacteroidetes>Bacteroidia>Bacteroidales>[Paraprevotellaceae]>YRC22                   | 0.022     | 0.014     | 0.013     | 0.014     | 0.016     | 0.013     | 0.014     | 0.011     | 0.023     | 0.011      | 0.157          |
| Verrucomicrobia>Verruco-5>WCHB1-41>RFP12>unclassified genus                          | 0.020     | 0.021     | 0.023     | 0.025     | 0.017     | 0.021     | 0.016     | 0.017     | 0.028     | 0.026      | 0.004          |
| Firmicutes>Clostridia>Clostridiales>Ruminococcaceae>Ruminococcus                     | 0.020     | 0.025     | 0.021     | 0.021     | 0.026     | 0.018     | 0.026     | 0.020     | 0.017     | 0.021      | 0.348          |
| Bacteroidetes>Bacteroidia>Bacteroidales>[Paraprevotellaceae]>unclassified genus      | 0.016     | 0.016     | 0.023     | 0.016     | 0.025     | 0.015     | 0.015     | 0.022     | 0.018     | 0.023      | 0.057          |
| Bacteroidetes>Bacteroidia>Bacteroidales>Prevotellaceae>Prevotella                    | 0.014     | 0.027     | 0.020     | 0.023     | 0.026     | 0.017     | 0.023     | 0.028     | 0.022     | 0.016      | 0.135          |
| Bacteroidetes>Bacteroidia>Bacteroidales>Bacteroidaceae>BF311                         | 0.014     | 0.005     | 0.009     | 0.008     | 0.006     | 0.008     | 0.010     | 0.005     | 0.004     | 0.006      | 0.005          |
| Bacteroidetes>Bacteroidia>Bacteroidales>[Paraprevotellaceae]>CF231                   | 0.012     | 0.018     | 0.009     | 0.011     | 0.010     | 0.010     | 0.013     | 0.006     | 0.011     | 0.007      | 0.022          |
| Spirochaetes>Spirochaetes>Spirochaetales>Spirochaetaceae>Treponema                   | 0.011     | 0.016     | 0.011     | 0.009     | 0.009     | 0.009     | 0.011     | 0.008     | 0.014     | 0.008      | 0.009          |
| Verrucomicrobia>Verrucomicrobiae>Verrucomicrobiales>Verrucomicrobiacea e>Akkermansia | 0.011     | 0.005     | 0.012     | 0.014     | 0.011     | 0.019     | 0.010     | 0.020     | 0.016     | 0.026      | 0.002          |
| Firmicutes>Clostridia>Clostridiales>Lachnospiraceae>Coprococcus                      | 0.010     | 0.011     | 0.008     | 0.010     | 0.012     | 0.012     | 0.016     | 0.011     | 0.012     | 0.016      | 0.035          |
| Firmicutes>Clostridia>Clostridiales>Clostridiaceae>unclassified genus                | 0.009     | 0.005     | 0.007     | 0.011     | 0.010     | 0.011     | 0.007     | 0.011     | 0.012     | 0.013      | 0.017          |
| Firmicutes>Clostridia>Clostridiales>Ruminococcaceae>Oscillospira                     | 0.008     | 0.011     | 0.008     | 0.008     | 0.008     | 0.007     | 0.009     | 0.010     | 0.007     | 0.008      | 0.245          |
| Firmicutes>Erysipelotrichi>Erysipelotrichales>Erysipelotrichaceae>p-75-a5            | 0.008     | 0.013     | 0.013     | 0.010     | 0.009     | 0.015     | 0.010     | 0.015     | 0.009     | 0.009      | 0.077          |
| Actinobacteria>Coriobacteriia>Coriobacteriales>Coriobacteriaceae>unclassified genus  | 0.007     | 0.006     | 0.007     | 0.007     | 0.007     | 0.009     | 0.009     | 0.008     | 0.009     | 0.009      | 0.463          |
| Firmicutes>Clostridia>Clostridiales>Christensenellaceae>unclassified genus           | 0.006     | 0.005     | 0.008     | 0.006     | 0.007     | 0.006     | 0.008     | 0.008     | 0.006     | 0.006      | 0.019          |
| Bacteroidetes>Bacteroidia>Bacteroidales>[Paraprevotellaceae]>[Prevotella]            | 0.006     | 0.009     | 0.002     | 0.006     | 0.004     | 0.004     | 0.004     | 0.002     | 0.005     | 0.006      | 0.002          |
| Bacteroidetes>Bacteroidia>Bacteroidales>RF16>unclassified genus                      | 0.006     | 0.006     | 0.007     | 0.008     | 0.005     | 0.008     | 0.005     | 0.004     | 0.007     | 0.005      | 0.967          |
| Firmicutes>Clostridia>Clostridiales>Clostridiaceae>Clostridium                       | 0.006     | 0.008     | 0.006     | 0.009     | 0.008     | 0.005     | 0.009     | 0.007     | 0.008     | 0.008      | 0.035          |
| Firmicutes>Clostridia>Clostridiales>Veillonellaceae>Phascolarctobacterium            | 0.005     | 0.011     | 0.005     | 0.007     | 0.011     | 0.005     | 0.009     | 0.005     | 0.009     | 0.010      | 0.031          |
| Tenericutes>Mollicutes>RF39>unclassified family>unclassified genus                   | 0.005     | 0.004     | 0.006     | 0.005     | 0.004     | 0.005     | 0.004     | 0.005     | 0.003     | 0.003      | 0.004          |
| Firmicutes>Clostridia>Clostridiales>Veillonellaceae>unclassified genus               | 0.005     | 0.003     | 0.003     | 0.003     | 0.003     | 0.001     | 0.002     | 0.003     | 0.003     | 0.002      | 0.234          |

|                                                                                            |        |        |        |        |        |        |        |        |        |        |         |
|--------------------------------------------------------------------------------------------|--------|--------|--------|--------|--------|--------|--------|--------|--------|--------|---------|
| Firmicutes>Clostridia>Clostridiales>Lachnospiraceae>unclassified genus                     | 0.005  | 0.008  | 0.005  | 0.007  | 0.005  | 0.007  | 0.007  | 0.004  | 0.004  | 0.004  | 0.003   |
| Cyanobacteria>4C0d-2>YS2>unclassified family>unclassified genus                            | 0.005  | 0.004  | 0.004  | 0.003  | 0.004  | 0.003  | 0.003  | 0.004  | 0.002  | 0.002  | 0.007   |
| Fibrobacteres>Fibrobacteria>Fibrobacterales>Fibrobacteraceae>Fibrobacter                   | 0.004  | 0.003  | 0.004  | 0.003  | 0.005  | 0.003  | 0.003  | 0.001  | 0.004  | 0.002  | 0.098   |
| Firmicutes>Clostridia>Clostridiales>Lachnospiraceae>Pseudobutyrvibrio                      | 0.004  | 0.004  | 0.003  | 0.005  | 0.004  | 0.004  | 0.004  | 0.004  | 0.005  | 0.004  | 0.843   |
| Firmicutes>Clostridia>Clostridiales>Eubacteriaceae>Pseudoramibacter_Eubacterium            | 0.004  | 0.003  | 0.006  | 0.006  | 0.003  | 0.007  | 0.002  | 0.005  | 0.006  | 0.004  | 0.007   |
| Spirochaetes>MVP-15>PL-11B10>unclassified family>unclassified genus                        | 0.004  | 0.001  | 0.003  | 0.001  | 0.004  | <0.001 | 0.003  | 0.002  | 0.002  | 0.001  | 0.028   |
| Firmicutes>Clostridia>Clostridiales>Lachnospiraceae>Blautia                                | 0.004  | 0.004  | 0.004  | 0.004  | 0.004  | 0.005  | 0.005  | 0.004  | 0.005  | 0.008  | 0.365   |
| Bacteroidetes>Bacteroidia>Bacteroidales>Porphyromonadaceae>Paludibacter                    | 0.004  | 0.007  | 0.010  | 0.007  | 0.003  | 0.002  | 0.007  | 0.007  | 0.005  | 0.002  | 0.699   |
| Firmicutes>Bacilli>Lactobacillales>Lactobacillaceae>Lactobacillus                          | 0.003  | 0.003  | 0.005  | 0.005  | 0.003  | 0.004  | 0.007  | 0.008  | 0.005  | 0.017  | 0.276   |
| Firmicutes>Clostridia>Clostridiales>Clostridiaceae>Sarcina                                 | 0.003  | 0.001  | 0.001  | 0.001  | 0.001  | 0.004  | 0.001  | 0.002  | 0.002  | 0.002  | 0.493   |
| Firmicutes>Clostridia>Clostridiales>unclassified family>unclassified genus                 | 0.003  | 0.004  | 0.005  | 0.003  | 0.003  | 0.004  | 0.003  | 0.003  | 0.003  | 0.004  | 0.313   |
| Bacteroidetes>Bacteroidia>Bacteroidales>Bacteroidaceae>Bacteroides                         | 0.003  | 0.004  | 0.005  | 0.007  | 0.004  | 0.003  | 0.003  | 0.003  | 0.006  | 0.003  | 0.308   |
| Actinobacteria>Actinobacteria>Actinomycetales>Nocardiaceae>Rhodococcus                     | 0.002  | 0.002  | 0.002  | 0.002  | 0.002  | 0.003  | 0.002  | 0.001  | 0.002  | 0.001  | 0.409   |
| Euryarchaeota>Methanobacteria>Methanobacteriales>Methanobacteriaceae>Methanobrevibacter    | 0.002  | 0      | 0.001  | 0.001  | 0.001  | 0.001  | 0.001  | 0.001  | <0.001 | 0.001  | 0.032   |
| Firmicutes>Erysipelotrichi>Erysipelotrichales>Erysipelotrichaceae>RFN20                    | 0.002  | 0.001  | 0.002  | 0.001  | 0.001  | 0.002  | 0.002  | 0.002  | 0.003  | 0.002  | 0.851   |
| WPS-2>unclassified class>unclassified order>unclassified family>unclassified genus         | 0.002  | 0.001  | 0.002  | 0.001  | 0.001  | 0.004  | 0.002  | 0.002  | 0.002  | 0.001  | 0.049   |
| Bacteroidetes>Bacteroidia>Bacteroidales>Bacteroidaceae>unclassified genus                  | 0.001  | 0.002  | 0.004  | 0.004  | 0.003  | 0.002  | 0.002  | 0.002  | <0.001 | 0.001  | 0.001*  |
| Firmicutes>Clostridia>Clostridiales>Lachnospiraceae>Epulopiscium                           | 0.001  | <0.001 | <0.001 | <0.001 | 0.001  | <0.001 | <0.001 | <0.001 | <0.001 | <0.001 | 0.009   |
| Firmicutes>Clostridia>Clostridiales>Lachnospiraceae>[Ruminococcus]                         | 0.001  | 0.001  | 0.006  | 0.001  | 0.001  | 0.001  | 0.004  | 0.002  | 0.001  | 0.001  | 0.655   |
| Proteobacteria>Gammaproteobacteria>Enterobacteriales>Enterobacteriaceae>unclassified genus | <0.001 | <0.001 | <0.001 | 0.001  | <0.001 | <0.001 | <0.001 | <0.001 | <0.001 | <0.001 | 0.940   |
| Fusobacteria>Fusobacteriia>Fusobacteriales>Fusobacteriaceae>Fusobacterium                  | <0.001 | <0.001 | <0.001 | 0.001  | 0      | <0.001 | <0.001 | 0      | <0.001 | <0.001 | 0.859   |
| Verrucomicrobia>Verruco-5>LD1-PB3>unclassified family>unclassified genus                   | 0      | <0.001 | 0      | 0      | 0      | 0      | <0.001 | 0.002  | 0      | 0      | <0.001* |
| Other Genera <1%                                                                           | 0.042  | 0.042  | 0.044  | 0.042  | 0.043  | 0.055  | 0.052  | 0.042  | 0.047  | 0.04   | 0.046   |

\*Level of significance was  $P \leq 0.001$  after Bonferroni correction for multiple comparisons

**Table S6. Comparison of mean relative abundance at phylum level between seasons.**

| <b>Taxon</b>     | <b>Autumn</b> | <b>Spring</b> | <b>Winter</b> | <b>Summer</b> | <b>P value</b> |
|------------------|---------------|---------------|---------------|---------------|----------------|
| Firmicutes       | 0.607         | 0.666         | 0.687         | 0.599         | <0.001*        |
| Bacteroidetes    | 0.234         | 0.215         | 0.183         | 0.244         | 0.008          |
| Verrucomicrobia  | 0.042         | 0.028         | 0.037         | 0.040         | <0.001*        |
| Unassigned phyla | 0.032         | 0.025         | 0.023         | 0.037         | <0.001*        |
| Actinobacteria   | 0.022         | 0.014         | 0.016         | 0.017         | 0.004          |
| TM7              | 0.017         | 0.016         | 0.019         | 0.018         | 0.906          |
| Spirochaetes     | 0.016         | 0.011         | 0.010         | 0.018         | 0.009          |
| Proteobacteria   | 0.007         | 0.004         | 0.005         | 0.007         | <0.001*        |
| Tenericutes      | 0.006         | 0.005         | 0.005         | 0.005         | 0.752          |
| Fibrobacteres    | 0.004         | 0.004         | 0.002         | 0.003         | 0.415          |
| Cyanobacteria    | 0.004         | 0.003         | 0.003         | 0.004         | 0.01           |
| Euryarchaeota    | 0.002         | 0.001         | 0.001         | 0.002         | <0.001*        |
| WPS-2            | 0.002         | 0.001         | 0.002         | 0.001         | 0.079          |
| Fusobacteria     | <0.001        | <0.001        | <0.001        | <0.001        | 0.107          |
| Other Phyla <1%  | 0.007         | 0.007         | 0.007         | 0.007         | 0.636          |

\*Level of significance was  $P \leq 0.003$  after Bonferroni correction for multiple comparisons

Autumn – March, April, May; Spring – September, October, November; Winter – June, July, August; Summer – December, January, February

**Table S7. Comparison of mean relative abundance at genus level between seasons.**

| <b>Taxon</b>                                                                        | <b>Autumn</b> | <b>Spring</b> | <b>Winter</b> | <b>Summer</b> | <b>P value</b> |
|-------------------------------------------------------------------------------------|---------------|---------------|---------------|---------------|----------------|
| Firmicutes>Clostridia>Clostridiales>Ruminococcaceae>unclassified genus              | 0.187         | 0.233         | 0.226         | 0.223         | <0.001*        |
| Firmicutes>Clostridia>Clostridiales>Lachnospiraceae>unclassified genus              | 0.144         | 0.138         | 0.139         | 0.121         | 0.088          |
| Firmicutes>Clostridia>Clostridiales>unclassified family>unclassified genus          | 0.117         | 0.134         | 0.144         | 0.109         | <0.001*        |
| Bacteroidetes>Bacteroidia>Bacteroidales>unclassified family>unclassified genus      | 0.105         | 0.101         | 0.075         | 0.114         | <0.001*        |
| Unassigned genera                                                                   | 0.032         | 0.025         | 0.023         | 0.037         | <0.001*        |
| Verrucomicrobia>Verruco-5>WCHB1-41>RFP12>unclassified genus                         | 0.024         | 0.022         | 0.016         | 0.024         | <0.001*        |
| Bacteroidetes>Bacteroidia>Bacteroidales>Prevotellaceae>Prevotella                   | 0.024         | 0.024         | 0.02          | 0.018         | 0.272          |
| Firmicutes>Clostridia>Clostridiales>Ruminococcaceae>Ruminococcus                    | 0.022         | 0.023         | 0.024         | 0.017         | 0.018          |
| Bacteroidetes>Bacteroidia>Bacteroidales>[Paraprevotellaceae]>unclassified genus     | 0.021         | 0.015         | 0.024         | 0.017         | 0.146          |
| Firmicutes>Clostridia>Clostridiales>[Mogibacteriaceae]>unclassified genus           | 0.019         | 0.027         | 0.021         | 0.021         | <0.001*        |
| Verrucomicrobia>Verrucomicrobiae>Verrucomicrobiales>Verrucomicrobiaceae>Akkermansia | 0.018         | 0.006         | 0.02          | 0.014         | <0.001*        |
| Bacteroidetes>Bacteroidia>Bacteroidales>[Paraprevotellaceae]>CF231                  | 0.017         | 0.011         | 0.005         | 0.01          | <0.001*        |
| Bacteroidetes>Bacteroidia>Bacteroidales>[Paraprevotellaceae]>YRC22                  | 0.017         | 0.015         | 0.017         | 0.012         | 0.384          |
| Bacteroidetes>Bacteroidia>Bacteroidales>BS11>unclassified genus                     | 0.016         | 0.021         | 0.02          | 0.022         | 0.16           |
| TM7>TM7-3>CW040>F16>unclassified genus                                              | 0.016         | 0.016         | 0.019         | 0.017         | 0.886          |
| Spirochaetes>Spirochaetes>Spirochaetales>Spirochaetaceae>Treponema                  | 0.014         | 0.01          | 0.008         | 0.011         | 0.06           |
| Firmicutes>Erysipelotrichi>Erysipelotrichales>Erysipelotrichaceae>p-75-a5           | 0.011         | 0.013         | 0.01          | 0.01          | 0.035          |
| Firmicutes>Clostridia>Clostridiales>Lachnospiraceae>Coprococcus                     | 0.011         | 0.011         | 0.014         | 0.011         | 0.051          |
| Firmicutes>Clostridia>Clostridiales>Clostridiaceae>unclassified genus               | 0.009         | 0.009         | 0.014         | 0.006         | <0.001*        |
| Firmicutes>Clostridia>Clostridiales>Veillonellaceae>Phascolarctobacterium           | 0.009         | 0.005         | 0.007         | 0.01          | 0.023          |
| Firmicutes>Clostridia>Clostridiales>Clostridiaceae>Clostridium                      | 0.008         | 0.01          | 0.007         | 0.006         | <0.001*        |
| Actinobacteria>Coriobacteriia>Coriobacteriales>Coriobacteriaceae>unclassified genus | 0.008         | 0.008         | 0.008         | 0.006         | 0.01           |
| Firmicutes>Clostridia>Clostridiales>Ruminococcaceae>Oscillospira                    | 0.008         | 0.007         | 0.01          | 0.008         | 0.177          |
| Firmicutes>Bacilli>Lactobacillales>Lactobacillaceae>Lactobacillus                   | 0.007         | 0.002         | 0.012         | 0.002         | <0.001*        |
| Bacteroidetes>Bacteroidia>Bacteroidales>Bacteroidaceae>BF311                        | 0.007         | 0.008         | 0.006         | 0.009         | 0.006          |
| Bacteroidetes>Bacteroidia>Bacteroidales>RF16>unclassified genus                     | 0.006         | 0.004         | 0.001         | 0.012         | <0.001*        |
| Firmicutes>Clostridia>Clostridiales>Lachnospiraceae>unclassified genus              | 0.006         | 0.007         | 0.004         | 0.005         | <0.001*        |
| Bacteroidetes>Bacteroidia>Bacteroidales>[Paraprevotellaceae]>[Prevotella]           | 0.006         | 0.004         | 0.004         | 0.005         | 0.097          |
| Bacteroidetes>Bacteroidia>Bacteroidales>Porphyromonadaceae>Paludibacter             | 0.005         | 0.003         | 0.001         | 0.013         | <0.001*        |
| Firmicutes>Clostridia>Clostridiales>Christensenellaceae>unclassified genus          | 0.005         | 0.007         | 0.008         | 0.006         | 0.005          |
| Firmicutes>Clostridia>Clostridiales>Lachnospiraceae>Pseudobutyrvibrio               | 0.005         | 0.004         | 0.003         | 0.004         | 0.279          |

|                                                                                            |        |        |        |        |         |
|--------------------------------------------------------------------------------------------|--------|--------|--------|--------|---------|
| Tenericutes>Mollicutes>RF39>unclassified family>unclassified genus                         | 0.005  | 0.004  | 0.005  | 0.004  | 0.343   |
| Firmicutes>Clostridia>Clostridiales>unclassified family>unclassified genus                 | 0.004  | 0.003  | 0.004  | 0.004  | 0.002   |
| Cyanobacteria>4C0d-2>YS2>unclassified family>unclassified genus                            | 0.004  | 0.003  | 0.003  | 0.004  | 0.007   |
| Bacteroidetes>Bacteroidia>Bacteroidales>Bacteroidaceae>Bacteroides                         | 0.004  | 0.004  | 0.004  | 0.004  | 0.014   |
| Firmicutes>Clostridia>Clostridiales>Eubacteriaceae>Pseudoramibacter_Eubacterium            | 0.004  | 0.006  | 0.004  | 0.005  | 0.122   |
| Fibrobacteres>Fibrobacteria>Fibrobacterales>Fibrobacteraceae>Fibrobacter                   | 0.004  | 0.004  | 0.002  | 0.003  | 0.415   |
| Firmicutes>Clostridia>Clostridiales>Lachnospiraceae>Blautia                                | 0.004  | 0.004  | 0.004  | 0.005  | 0.831   |
| Firmicutes>Clostridia>Clostridiales>Veillonellaceae>unclassified genus                     | 0.003  | 0.002  | 0.005  | 0.001  | <0.001* |
| Firmicutes>Clostridia>Clostridiales>Clostridiaceae>Sarcina                                 | 0.002  | 0.001  | 0.004  | 0      | <0.001* |
| Firmicutes>Erysipelotrichi>Erysipelotrichales>Erysipelotrichaceae>RFN20                    | 0.002  | 0.002  | 0.001  | 0.003  | <0.001* |
| Actinobacteria>Actinobacteria>Actinomycetales>Nocardiaceae>Rhodococcus                     | 0.002  | 0.001  | 0.001  | 0.003  | <0.001* |
| Euryarchaeota>Methanobacteria>Methanobacteriales>Methanobacteriaceae>Methanobrevibacter    | 0.002  | 0.001  | 0.001  | 0.001  | 0.001*  |
| Bacteroidetes>Bacteroidia>Bacteroidales>Bacteroidaceae>unclassified genus                  | 0.002  | 0.003  | 0.002  | 0.002  | 0.061   |
| WPS-2>unclassified class>unclassified order>unclassified family>unclassified genus         | 0.002  | 0.001  | 0.002  | 0.001  | 0.079   |
| Spirochaetes>MVP-15>PL-11B10>unclassified family>unclassified genus                        | 0.001  | 0.001  | 0.001  | 0.005  | 0.002   |
| Firmicutes>Clostridia>Clostridiales>Lachnospiraceae>[Ruminococcus]                         | 0.001  | 0.001  | 0.005  | 0.001  | 0.917   |
| Firmicutes>Clostridia>Clostridiales>Lachnospiraceae>Epulopiscium                           | <0.001 | <0.001 | 0.001  | <0.001 | <0.001* |
| Proteobacteria>Gammaproteobacteria>Enterobacteriales>Enterobacteriaceae>unclassified genus | <0.001 | <0.001 | <0.001 | <0.001 | 0.019   |
| Fusobacteria>Fusobacteriia>Fusobacteriales>Fusobacteriaceae>Fusobacterium                  | <0.001 | <0.001 | <0.001 | <0.001 | 0.056   |
| Verrucomicrobia>Verruco-5>LD1-PB3>unclassified family>unclassified genus                   | <0.001 | <0.001 | <0.001 | 0.001  | 0.511   |
| Other Genera <1%                                                                           | 0.052  | 0.039  | 0.039  | 0.051  | <0.001* |

\*Level of significance was  $P \leq 0.001$  after Bonferroni correction for multiple comparisons

Autumn – March, April, May; Spring – September, October, November; Winter – June, July, August; Summer – December, January, February

**Table S8. Comparison of mean relative abundance at phylum level between months.**

| <b>Taxon</b>     | <b>Jan</b> | <b>Feb</b> | <b>Mar</b> | <b>Apr</b> | <b>May</b> | <b>Jun</b> | <b>Jul</b> | <b>Aug</b> | <b>Sep</b> | <b>Oct</b> | <b>Nov</b> | <b>Dec</b> | <b>P value</b> |
|------------------|------------|------------|------------|------------|------------|------------|------------|------------|------------|------------|------------|------------|----------------|
| Firmicutes       | 0.600      | 0.534      | 0.508      | 0.656      | 0.664      | 0.677      | 0.697      | 0.688      | 0.668      | 0.673      | 0.656      | 0.662      | <0.001*        |
| Bacteroidetes    | 0.249      | 0.298      | 0.328      | 0.198      | 0.169      | 0.179      | 0.182      | 0.189      | 0.220      | 0.200      | 0.223      | 0.185      | <0.001*        |
| Unassigned phyla | 0.044      | 0.041      | 0.042      | 0.024      | 0.029      | 0.023      | 0.022      | 0.022      | 0.022      | 0.026      | 0.026      | 0.025      | <0.001*        |
| Verrucomicrobia  | 0.038      | 0.041      | 0.039      | 0.039      | 0.050      | 0.050      | 0.027      | 0.032      | 0.025      | 0.032      | 0.028      | 0.040      | 0.003*         |
| Spirochaetes     | 0.018      | 0.027      | 0.027      | 0.012      | 0.007      | 0.010      | 0.009      | 0.010      | 0.014      | 0.009      | 0.012      | 0.008      | <0.001*        |
| TM7              | 0.012      | 0.009      | 0.005      | 0.017      | 0.028      | 0.018      | 0.017      | 0.021      | 0.014      | 0.017      | 0.018      | 0.032      | <0.001*        |
| Actinobacteria   | 0.010      | 0.017      | 0.014      | 0.029      | 0.022      | 0.015      | 0.020      | 0.014      | 0.011      | 0.016      | 0.014      | 0.023      | <0.001*        |
| Proteobacteria   | 0.008      | 0.009      | 0.008      | 0.006      | 0.006      | 0.006      | 0.005      | 0.003      | 0.004      | 0.004      | 0.003      | 0.005      | <0.001*        |
| Tenericutes      | 0.005      | 0.005      | 0.006      | 0.004      | 0.009      | 0.006      | 0.004      | 0.006      | 0.005      | 0.005      | 0.006      | 0.006      | 0.009          |
| Cyanobacteria    | 0.003      | 0.005      | 0.005      | 0.003      | 0.003      | 0.002      | 0.002      | 0.005      | 0.003      | 0.003      | 0.003      | 0.004      | 0.001*         |
| Fibrobacteres    | 0.002      | 0.005      | 0.009      | 0.002      | <0.001     | 0.002      | 0.002      | 0.003      | 0.006      | 0.002      | 0.003      | 0.001      | <0.001*        |
| Euryarchaeota    | 0.002      | 0.002      | 0.001      | 0.004      | 0.001      | 0.001      | 0.001      | 0.001      | 0.001      | 0.002      | 0.001      | 0.001      | 0.001*         |
| WPS-2            | 0.002      | 0.001      | <0.001     | <0.001     | 0.004      | 0.003      | 0.002      | 0.001      | 0.002      | 0.001      | 0.001      | 0.001      | 0.008          |
| Fusobacteria     | <0.001     | <0.001     | <0.001     | <0.001     | <0.001     | 0.001      | <0.001     | <0.001     | <0.001     | <0.001     | <0.001     | <0.001     | 0.082          |
| Other Phyla <1%  | 0.008      | 0.006      | 0.007      | 0.007      | 0.007      | 0.006      | 0.008      | 0.006      | 0.006      | 0.008      | 0.007      | 0.007      | 0.206          |

\*Level of significance was  $P \leq 0.003$  after Bonferroni correction for multiple comparisons



**Table S9. Comparison of mean relative abundance at genus level between months.**

| <b>Taxon</b>                                                                        | <b>Jan</b> | <b>Feb</b> | <b>Mar</b> | <b>Apr</b> | <b>May</b> | <b>Jun</b> | <b>Jul</b> | <b>Aug</b> | <b>Sep</b> | <b>Oct</b> | <b>Nov</b> | <b>Dec</b> | <b>P value</b> |
|-------------------------------------------------------------------------------------|------------|------------|------------|------------|------------|------------|------------|------------|------------|------------|------------|------------|----------------|
| Firmicutes>Clostridia>Clostridiales>Ruminococcaceae>unclassified genus              | 0.248      | 0.186      | 0.169      | 0.166      | 0.230      | 0.219      | 0.232      | 0.228      | 0.251      | 0.237      | 0.212      | 0.234      | <0.001*        |
| Bacteroidetes>Bacteroidia>Bacteroidales>unclassified family>unclassified genus      | 0.116      | 0.135      | 0.157      | 0.089      | 0.066      | 0.063      | 0.077      | 0.086      | 0.108      | 0.098      | 0.099      | 0.093      | <0.001*        |
| Firmicutes>Clostridia>Clostridiales>Lachnospiraceae>unclassified genus              | 0.114      | 0.118      | 0.112      | 0.182      | 0.137      | 0.138      | 0.139      | 0.140      | 0.129      | 0.134      | 0.153      | 0.133      | 0.006          |
| Firmicutes>Clostridia>Clostridiales>unclassified family>unclassified genus          | 0.100      | 0.094      | 0.089      | 0.135      | 0.127      | 0.138      | 0.149      | 0.144      | 0.131      | 0.136      | 0.134      | 0.134      | <0.001*        |
| Unassigned genera                                                                   | 0.044      | 0.041      | 0.042      | 0.024      | 0.029      | 0.023      | 0.022      | 0.022      | 0.022      | 0.026      | 0.026      | 0.025      | <0.001*        |
| Verrucomicrobia>Verruco-5>WCHB1-41>RFP12>unclassified genus                         | 0.028      | 0.022      | 0.028      | 0.024      | 0.018      | 0.015      | 0.014      | 0.019      | 0.019      | 0.026      | 0.02       | 0.023      | <0.001*        |
| Firmicutes>Clostridia>Clostridiales>[Mogibacteriaceae]>unclassified genus           | 0.020      | 0.015      | 0.014      | 0.023      | 0.020      | 0.018      | 0.020      | 0.026      | 0.024      | 0.032      | 0.024      | 0.029      | <0.001*        |
| Bacteroidetes>Bacteroidia>Bacteroidales>RF16>unclassified genus                     | 0.019      | 0.016      | 0.016      | 0.001      | 0.001      | 0.001      | <0.001     | 0.003      | 0.006      | 0.004      | 0.003      | 0.002      | <0.001*        |
| Bacteroidetes>Bacteroidia>Bacteroidales>Porphyromonadaceae>Paludibacter             | 0.019      | 0.016      | 0.013      | <0.001     | <0.001     | 0.001      | 0.001      | 0.003      | 0.005      | 0.002      | 0.001      | 0.002      | <0.001*        |
| Bacteroidetes>Bacteroidia>Bacteroidales>BS11>unclassified genus                     | 0.019      | 0.024      | 0.017      | 0.009      | 0.025      | 0.024      | 0.022      | 0.015      | 0.019      | 0.026      | 0.019      | 0.022      | 0.014          |
| Bacteroidetes>Bacteroidia>Bacteroidales>Prevotellaceae>Prevotella                   | 0.015      | 0.027      | 0.038      | 0.023      | 0.009      | 0.019      | 0.021      | 0.021      | 0.020      | 0.018      | 0.034      | 0.013      | <0.001*        |
| Bacteroidetes>Bacteroidia>Bacteroidales>[Paraprevotellaceae]>unclassified genus     | 0.015      | 0.020      | 0.021      | 0.014      | 0.028      | 0.026      | 0.035      | 0.011      | 0.016      | 0.013      | 0.015      | 0.016      | 0.012          |
| Firmicutes>Clostridia>Clostridiales>Ruminococcaceae>Ruminococcus                    | 0.014      | 0.024      | 0.024      | 0.018      | 0.026      | 0.028      | 0.025      | 0.020      | 0.023      | 0.017      | 0.027      | 0.014      | 0.001*         |
| Firmicutes>Clostridia>Clostridiales>Veillonellaceae>Phascolarctobacterium           | 0.013      | 0.012      | 0.015      | 0.010      | 0.003      | 0.005      | 0.007      | 0.008      | 0.007      | 0.003      | 0.006      | 0.005      | <0.001*        |
| TM7>TM7-3>CW040>F16>unclassified genus                                              | 0.012      | 0.009      | 0.005      | 0.017      | 0.028      | 0.018      | 0.017      | 0.021      | 0.014      | 0.017      | 0.017      | 0.031      | <0.001*        |
| Bacteroidetes>Bacteroidia>Bacteroidales>[Paraprevotellaceae]>YRC22                  | 0.012      | 0.016      | 0.015      | 0.017      | 0.019      | 0.019      | 0.015      | 0.016      | 0.015      | 0.012      | 0.017      | 0.008      | 0.06           |
| Bacteroidetes>Bacteroidia>Bacteroidales>Bacteroidaceae>BF311                        | 0.011      | 0.009      | 0.010      | 0.003      | 0.007      | 0.003      | 0.003      | 0.011      | 0.010      | 0.007      | 0.008      | 0.008      | <0.001*        |
| Firmicutes>Clostridia>Clostridiales>Ruminococcaceae>Oscillospira                    | 0.011      | 0.008      | 0.007      | 0.008      | 0.008      | 0.008      | 0.016      | 0.007      | 0.009      | 0.007      | 0.007      | 0.007      | 0.002          |
| Bacteroidetes>Bacteroidia>Bacteroidales>[Paraprevotellaceae]>CF231                  | 0.009      | 0.011      | 0.015      | 0.029      | 0.004      | 0.005      | 0.002      | 0.009      | 0.009      | 0.010      | 0.014      | 0.010      | <0.001*        |
| Spirochaetes>Spirochaetes>Spirochaetales>Spirochaetaceae>Treponema                  | 0.009      | 0.017      | 0.023      | 0.012      | 0.006      | 0.009      | 0.007      | 0.008      | 0.011      | 0.007      | 0.010      | 0.006      | <0.001*        |
| Verrucomicrobia>Verrucomicrobiae>Verrucomicrobiales>Verrucomicrobiaceae>Akkermansia | 0.009      | 0.018      | 0.010      | 0.014      | 0.031      | 0.035      | 0.012      | 0.012      | 0.005      | 0.005      | 0.008      | 0.014      | <0.001*        |

|                                                                                     |       |        |        |        |        |       |        |       |       |       |       |       |         |
|-------------------------------------------------------------------------------------|-------|--------|--------|--------|--------|-------|--------|-------|-------|-------|-------|-------|---------|
| Firmicutes>Clostridia>Clostridiales>Lachnospiraceae>Coproccoccus                    | 0.009 | 0.012  | 0.008  | 0.013  | 0.011  | 0.014 | 0.013  | 0.016 | 0.013 | 0.009 | 0.012 | 0.013 | 0.004   |
| Firmicutes>Erysipelotrichi>Erysipelotrichales>Erysipelotrichaceae>p-75-a5           | 0.008 | 0.005  | 0.007  | 0.013  | 0.013  | 0.008 | 0.010  | 0.012 | 0.010 | 0.019 | 0.011 | 0.018 | <0.001* |
| Spirochaetes>MVP-15>PL-11B10>unclassified family>unclassified genus                 | 0.006 | 0.009  | 0.003  | <0.001 | 0      | 0.001 | 0.002  | 0.002 | 0.001 | 0.001 | 0.001 | 0     | <0.001* |
| Firmicutes>Clostridia>Clostridiales>Clostridiaceae>unclassified genus               | 0.006 | 0.005  | 0.005  | 0.009  | 0.013  | 0.020 | 0.009  | 0.013 | 0.010 | 0.012 | 0.006 | 0.008 | <0.001* |
| Firmicutes>Clostridia>Clostridiales>Christensenellaceae>unclassified genus          | 0.006 | 0.005  | 0.005  | 0.005  | 0.006  | 0.005 | 0.011  | 0.007 | 0.006 | 0.008 | 0.006 | 0.008 | <0.001* |
| Firmicutes>Clostridia>Clostridiales>Lachnospiraceae>unclassified genus              | 0.005 | 0.005  | 0.006  | 0.008  | 0.004  | 0.004 | 0.003  | 0.006 | 0.006 | 0.007 | 0.008 | 0.005 | <0.001* |
| Firmicutes>Clostridia>Clostridiales>Lachnospiraceae>Blautia                         | 0.005 | 0.005  | 0.003  | 0.007  | 0.003  | 0.005 | 0.003  | 0.006 | 0.005 | 0.003 | 0.005 | 0.006 | <0.001* |
| Bacteroidetes>Bacteroidia>Bacteroidales>[Paraprevotellaceae]>[Prevotella]           | 0.005 | 0.009  | 0.009  | 0.005  | 0.003  | 0.006 | 0.003  | 0.004 | 0.005 | 0.002 | 0.004 | 0.002 | <0.001* |
| Firmicutes>Erysipelotrichi>Erysipelotrichales>Erysipelotrichaceae>RFN20             | 0.004 | 0.003  | 0.006  | 0.001  | <0.001 | 0.001 | <0.001 | 0.002 | 0.002 | 0.002 | 0.001 | 0.002 | <0.001* |
| Actinobacteria>Coriobacteriia>Coriobacteriales>Coriobacteriaceae>unclassified genus | 0.004 | 0.004  | 0.004  | 0.011  | 0.010  | 0.006 | 0.010  | 0.009 | 0.007 | 0.010 | 0.007 | 0.010 | <0.001* |
| Firmicutes>Clostridia>Clostridiales>Clostridiaceae>Clostridium                      | 0.004 | 0.005  | 0.008  | 0.010  | 0.007  | 0.005 | 0.007  | 0.008 | 0.009 | 0.009 | 0.011 | 0.007 | <0.001* |
| Bacteroidetes>Bacteroidia>Bacteroidales>Bacteroidaceae>Bacteroides                  | 0.004 | 0.006  | 0.007  | 0.002  | 0.002  | 0.009 | 0.002  | 0.002 | 0.004 | 0.004 | 0.003 | 0.003 | <0.001* |
| Firmicutes>Clostridia>Clostridiales>Eubacteriaceae>Pseudoramibacter_Eubacterium     | 0.004 | 0.002  | 0.003  | 0.005  | 0.003  | 0.002 | 0.003  | 0.006 | 0.004 | 0.010 | 0.004 | 0.009 | <0.001* |
| Firmicutes>Clostridia>Clostridiales>unclassified family>unclassified genus          | 0.004 | 0.004  | 0.003  | 0.005  | 0.003  | 0.003 | 0.004  | 0.003 | 0.003 | 0.003 | 0.003 | 0.004 | 0.001*  |
| Firmicutes>Clostridia>Clostridiales>Lachnospiraceae>Pseudobutyrvibrio               | 0.004 | 0.004  | 0.004  | 0.007  | 0.003  | 0.004 | 0.002  | 0.004 | 0.004 | 0.004 | 0.005 | 0.003 | 0.046   |
| Firmicutes>Bacilli>Lactobacillales>Lactobacillaceae>Lactobacillus                   | 0.003 | 0.001  | 0      | 0.003  | 0.019  | 0.018 | 0.008  | 0.009 | 0.004 | 0.001 | 0.002 | 0.004 | <0.001* |
| Tenericutes>Mollicutes>RF39>unclassified family>unclassified genus                  | 0.003 | 0.003  | 0.002  | 0.003  | 0.009  | 0.006 | 0.004  | 0.005 | 0.004 | 0.004 | 0.005 | 0.005 | <0.001* |
| Cyanobacteria>4C0d-2>YS2>unclassified family>unclassified genus                     | 0.003 | 0.005  | 0.005  | 0.003  | 0.002  | 0.002 | 0.002  | 0.004 | 0.003 | 0.003 | 0.003 | 0.003 | <0.001* |
| Fibrobacteres>Fibrobacteria>Fibrobacterales>Fibrobacteraceae>Fibrobacter            | 0.002 | 0.005  | 0.009  | 0.002  | 0      | 0.002 | 0.002  | 0.003 | 0.006 | 0.002 | 0.003 | 0.001 | <0.001* |
| Bacteroidetes>Bacteroidia>Bacteroidales>Bacteroidaceae>unclassified genus           | 0.002 | 0.003  | 0.003  | 0.002  | 0.001  | 0.001 | <0.001 | 0.005 | 0.002 | 0.003 | 0.003 | 0.002 | 0.002   |
| WPS-2>unclassified class>unclassified order>unclassified family>unclassified genus  | 0.002 | 0.001  | <0.001 | <0.001 | 0.004  | 0.003 | 0.002  | 0.001 | 0.002 | 0.001 | 0.001 | 0.001 | 0.008   |
| Firmicutes>Clostridia>Clostridiales>Clostridiaceae>Sarcina                          | 0.001 | <0.001 | <0.001 | <0.001 | 0.006  | 0.005 | 0.003  | 0.003 | 0.001 | 0.001 | 0.001 | 0.001 | <0.001* |

|                                                                                            |        |        |        |        |        |       |        |        |        |        |        |        |         |
|--------------------------------------------------------------------------------------------|--------|--------|--------|--------|--------|-------|--------|--------|--------|--------|--------|--------|---------|
| Actinobacteria>Actinobacteria>Actinomycetales>Nocardiaceae>Rhodococcus                     | 0.001  | 0.004  | 0.003  | 0.002  | 0.002  | 0.002 | 0.001  | 0.001  | <0.001 | 0.001  | 0.001  | 0.003  | <0.001* |
| Firmicutes>Clostridia>Clostridiales>Veillonellaceae>unclassified genus                     | 0.001  | 0.002  | 0.002  | 0.003  | 0.004  | 0.005 | 0.006  | 0.003  | 0.002  | 0.002  | 0.002  | 0.001  | <0.001* |
| Firmicutes>Clostridia>Clostridiales>Lachnospiraceae>[Ruminococcus]                         | 0.001  | 0.001  | 0.001  | 0.001  | <0.001 | 0.007 | 0.007  | 0.001  | 0.001  | 0.001  | 0.001  | 0.001  | 0.026   |
| Firmicutes>Clostridia>Clostridiales>Lachnospiraceae>Epulopiscium                           | <0.001 | <0.001 | <0.001 | <0.001 | <0.001 | 0.001 | <0.001 | 0.002  | <0.001 | <0.001 | <0.001 | <0.001 | <0.001* |
| Euryarchaeota>Methanobacteria>Methanobacteriales>Methanobacteriaceae>Methanobrevibacter    | <0.001 | <0.001 | 0.001  | 0.003  | 0.001  | 0.001 | 0.001  | <0.001 | 0.001  | 0.001  | <0.001 | 0.001  | <0.001* |
| Proteobacteria>Gammaproteobacteria>Enterobacteriales>Enterobacteriaceae>unclassified genus | <0.001 | <0.001 | <0.001 | <0.001 | <0.001 | 0.001 | <0.001 | <0.001 | <0.001 | <0.001 | 0      | <0.001 | 0.002   |
| Fusobacteria>Fusobacteriia>Fusobacteriales>Fusobacteriaceae>Fusobacterium                  | <0.001 | <0.001 | 0      | 0      | <0.001 | 0.001 | <0.001 | 0      | 0      | 0      | 0      | <0.001 | 0.039   |
| Verrucomicrobia>Verruco-5>LD1-PB3>unclassified family>unclassified genus                   | <0.001 | <0.001 | <0.001 | 0      | 0      | 0     | <0.001 | <0.001 | 0      | <0.001 | <0.001 | 0.001  | 0.879   |
| Other Genera <1%                                                                           | 0.048  | 0.056  | 0.051  | 0.058  | 0.047  | 0.038 | 0.043  | 0.033  | 0.035  | 0.043  | 0.038  | 0.048  | <0.001* |

\*Level of significance was  $P \leq 0.001$  after Bonferroni correction for multiple comparisons

**Figure S1. Principal coordinate analysis of the faecal bacterial community by season and month.**

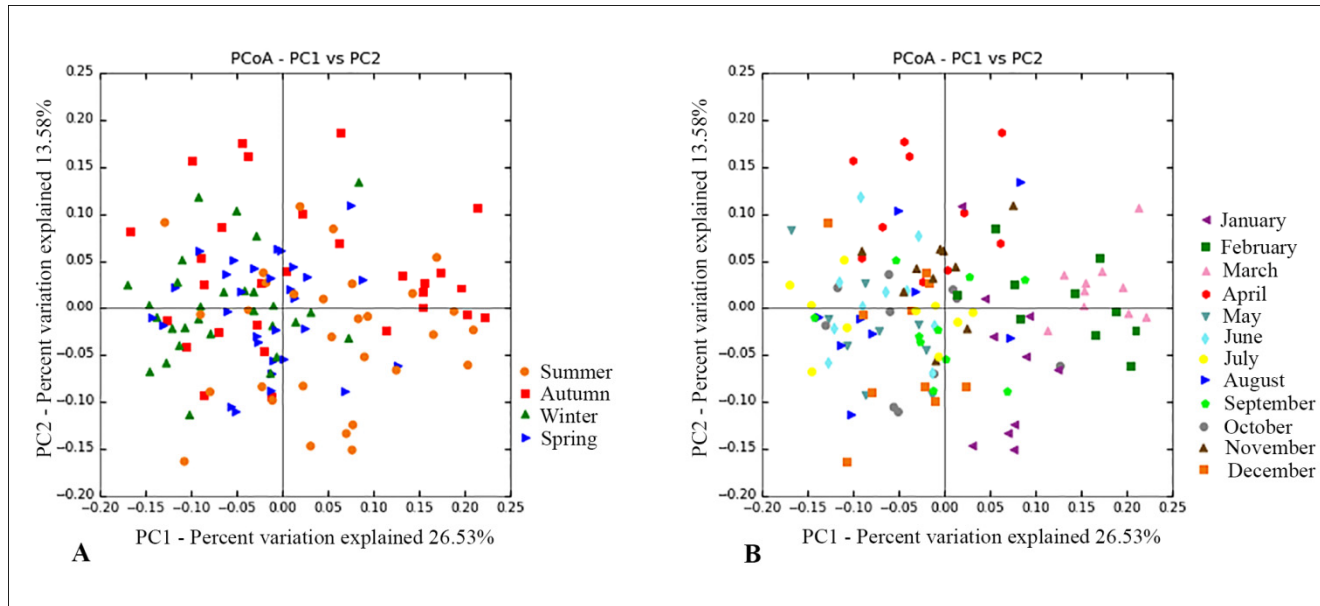

**Figure S2. Season-wise hierarchical clustering of the faecal bacterial community of horses included in the study.**

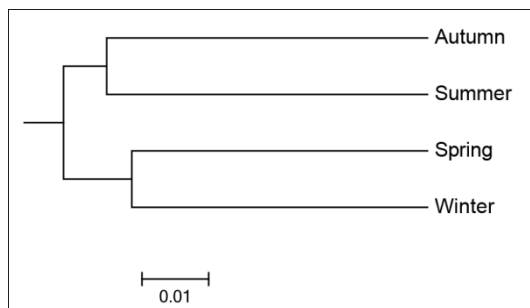

Supplement: s1 [file s1]
